# Supplementary material for: Lipidomic Profile of Human Sperm Membrane Identifies a Clustering of Lipids Associated with Semen Quality and Function
Source: MDPI journal article supplement (doi:10.3390/ijms25010297), 2023-12-25
Supplement: s1 [file s1]

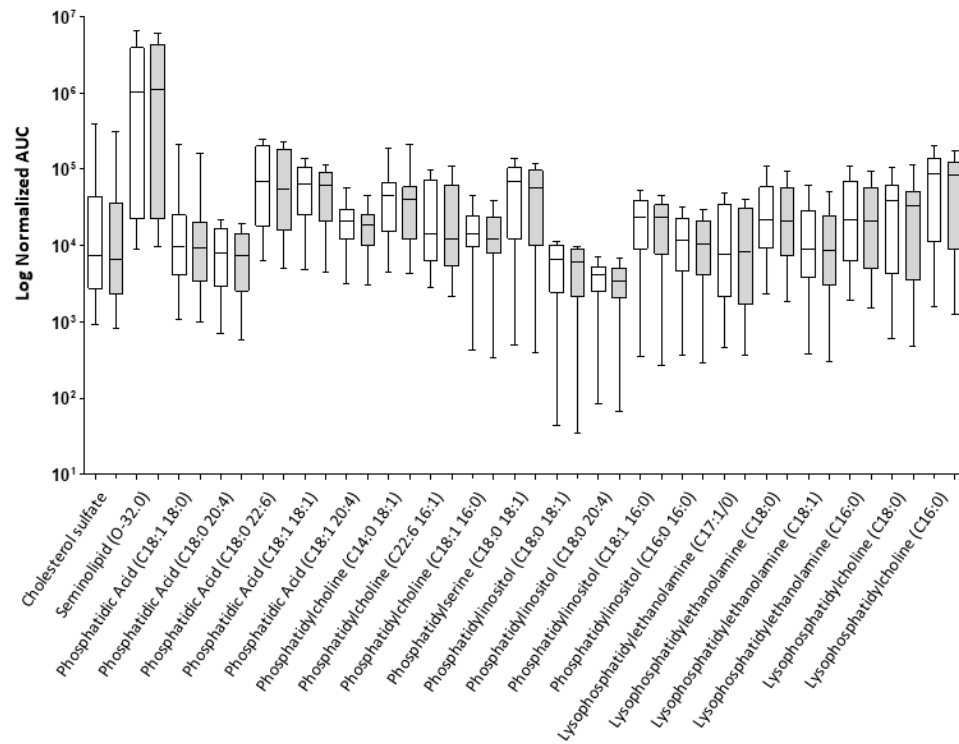

Supplemental Figure S1. Comparative evaluation of relative standardized lipid composition measured as logarithmic AUC between pelleted samples (white bars) and density gradient isolated sperm cells (grey bars) within a subpopulation of patients (N = 10).
